# Supplementary material for: Advancements in Exploiting Sporosarcina pasteurii as Sustainable Construction Material: A Review
Source: MDPI journal article supplement (doi:10.3390/su151813869), 2023-09-18
Supplement: s1 [file s1]

Archive with 1 entries (1 files):
- sustainability-2584286-supplementary.pdf
