# Supplementary material for: Advancements in Exploiting Sporosarcina pasteurii as Sustainable Construction Material: A Review
Source: MDPI journal article supplement (doi:10.3390/su151813869), 2023-09-18
Supplement: s1 [file s1 › sustainability-2584286-supplementary.pdf]

## Review

# Advancements in Exploiting *Sporosarcina Pasteurii* as Sustainable Construction Material: A Review

Shiva Khoshtinat <sup>1,\*</sup>
<sup>1</sup> Department of Materials, Chemistry and Chemical Engineering “Giulio Natta”, Politecnico di Milano, Milan, Italy; [shiva.khoshtinat@polimi.it](mailto:shiva.khoshtinat@polimi.it)

\* Correspondence: [shiva.khoshtinat@polimi.it](mailto:shiva.khoshtinat@polimi.it);

## 1. Supplementary Materials

**Table S1.** Selective examples of literature employing *S. Pasteurii* for soil stabilization via surface percolation and mixing techniques.

| Method              | Characterization |     |     |                           |                       |                        | Treat. Time (Days) | Comments and results                                                                                                                                                                                               | Ref.  |
|---------------------|------------------|-----|-----|---------------------------|-----------------------|------------------------|--------------------|--------------------------------------------------------------------------------------------------------------------------------------------------------------------------------------------------------------------|-------|
|                     | SEM              | EDS | XRD | CaCO <sub>3</sub> content | Mechanical test (MPa) | Permeability reduction |                    |                                                                                                                                                                                                                    |       |
| Surface Percolation | X                | X   | X   | 5.6-33.2                  | 4.8-11.5              |                        | 4                  | <ul style="list-style-type: none"> <li>• 92 hours treatment + 3 weeks curing</li> <li>• CaCO<sub>3</sub> crystal morphology were similar for technical and analytical grade cementation solution.</li> </ul>       | [74]  |
|                     | X                |     |     | 13<br>7.5                 | 0.5-2.5<br>0.5-11.3   |                        |                    | fine-grained: stiffness 166-1056 MPa<br>medium-grained: 153-1974 MPa<br>natural sand-gravel mixture: 355-1243 MPa                                                                                                  | [99]  |
|                     | X                | X   |     | 5.7-6.9                   | 0.57                  |                        | 14                 | <ul style="list-style-type: none"> <li>• 6 treatment cycles</li> <li>• CaCO<sub>3</sub> distribution was better along the sample with fewer fine particulates</li> </ul>                                           | [46]  |
|                     | X                |     |     |                           | X                     |                        |                    | <ul style="list-style-type: none"> <li>• the resistance of treated samples to cyclic stress improved</li> <li>• The relative density increased</li> </ul>                                                          | [134] |
|                     | X                | X   |     | 2.5-16<br>1.5-8           | 0.2-2.3<br>0.4-1.5    | X                      | 16                 | MICP: $E_{50} = 20-250$ MPa<br>EICP: $E_{50} = 50-200$ MPa                                                                                                                                                         | [43]  |
|                     | X                | X   | X   | 22                        | 14                    |                        | 14                 | <ul style="list-style-type: none"> <li>• 32 treatment cycle</li> <li>• CaCO<sub>3</sub> content, dry density, void ratio, and porosity were determined by XCT</li> </ul>                                           | [52]  |
|                     |                  |     |     | X                         |                       |                        | 12                 | <ul style="list-style-type: none"> <li>• CaCO<sub>3</sub> production rates is higher in samples treated with CaCl<sub>2</sub> and Ca(CH<sub>3</sub>COO)<sub>2</sub> than Ca(NO<sub>3</sub>)<sub>2</sub></li> </ul> | [71]  |
| Sprayed             | X                |     |     |                           | X                     |                        | 14                 | <ul style="list-style-type: none"> <li>• sand-steel interface shear strength increased 3 to 7 times</li> </ul>                                                                                                     | [102] |
|                     | X                |     |     | 65                        | 0.4                   |                        | 6                  | <ul style="list-style-type: none"> <li>• soil's resistance to rainfall simulation improved</li> </ul>                                                                                                              | [75]  |

|       |   |   |         |         |   |    |                                                                                                                                                                                                          |       |
|-------|---|---|---------|---------|---|----|----------------------------------------------------------------------------------------------------------------------------------------------------------------------------------------------------------|-------|
| Mixed |   |   | X       | 3.6-4.2 |   | 30 | <ul style="list-style-type: none"> <li>• CaCO<sub>3</sub> content = 270-310 kg/m<sup>3</sup></li> <li>• mechanical Characterisation done by three-point loading text (flexural strength)</li> </ul>      | [73]  |
|       |   |   | X       | 0.1-0.2 |   | 10 | <ul style="list-style-type: none"> <li>• CaCO<sub>3</sub> content = 19.7-82.3 kg/m<sup>3</sup></li> <li>• UCS values increased by 3 to 6 times</li> </ul>                                                | [45]  |
|       | X | X | 3.2-5.6 | 0.6     | X | 14 | • CBR test values : 7.5-14 %                                                                                                                                                                             | [2]   |
|       | X | X |         | X       | X | 21 | • tensile strength increased by 12 kPa                                                                                                                                                                   | [47]  |
|       | X | X | X       |         |   | 12 | <ul style="list-style-type: none"> <li>• the number of crystals produced by natural bacteria in soil is more, but the size of the crystals produced by Sp. Pasteurii is significantly greater</li> </ul> | [44]  |
|       | X | X |         | X       |   | 5  | • CBR = 49 %, moisture content=11.8 %                                                                                                                                                                    | [7]   |
|       | X | X | 14      | 0.8     |   |    | <ul style="list-style-type: none"> <li>• The prosity of the sample reduced by 10.6%</li> <li>• Using seawater in solution improved the MICP performance</li> </ul>                                       | [103] |

\* X: Experiment has been performed
